# Supplementary material
Source: MDPI journal article supplement (https://www.mdpi.com/2072-4292/13/21/4343)
Supplement: s1 [file s1]

## SUPPLEMENTARY MATERIAL

# How Much Shallow Coral Habitat is there on the Great Barrier Reef ?

Chris M. Roelfsema<sup>1</sup>, Mitchell B. Lyons<sup>1</sup>, Carolina Castro-Sanguino<sup>1</sup>, Eva M. Kovacs<sup>1</sup>, David Callaghan<sup>2</sup>, Magnus Wettle<sup>3</sup>, Kathryn Markey<sup>1</sup>, Rodney Borrego<sup>1</sup>, Paul Tudman<sup>1</sup>, Meredith Roe<sup>1</sup>, Emma V. Kennedy<sup>1,4</sup>, Manuel Gonzalez-Rivero<sup>4</sup>, Nick Murray<sup>1</sup> and Stuart R. Phinn<sup>1</sup>

<sup>1</sup> Remote Sensing Research Centre, School of Earth and Environmental Sciences, University of Queensland, QLD4072, Brisbane, Australia

<sup>2</sup> School of Engineering, University of Queensland, QLD4072, Brisbane, Australia

<sup>3</sup> EOMAP Australia Pty Ltd, Sunshine Coast, 4558, QLD, Australia

<sup>4</sup> Australian Institute of Marine Science, Townsville, School of Civil Engineering, University of Queensland, Brisbane, QLD, Australia.

\* Correspondence: [c.roelfsema@uq.edu.au](mailto:c.roelfsema@uq.edu.au)

## Supplementary Materials

Figure S1: Latitudinal distribution of reef area above 20 m MSL depth based on geomorphic zonation maps.

(A) Latitudinal distribution of total reef area (grey) and coral habitat (green) above 20 m MSL depth based on geomorphic zonation maps. Coral habitat = area of Reef Slope, Reef Crest, and Outer Reef Flat. (B) Spatial distribution of coral habitat along and across the GBR (each pixel is a  $0.2 \times 0.2$  degree cell).

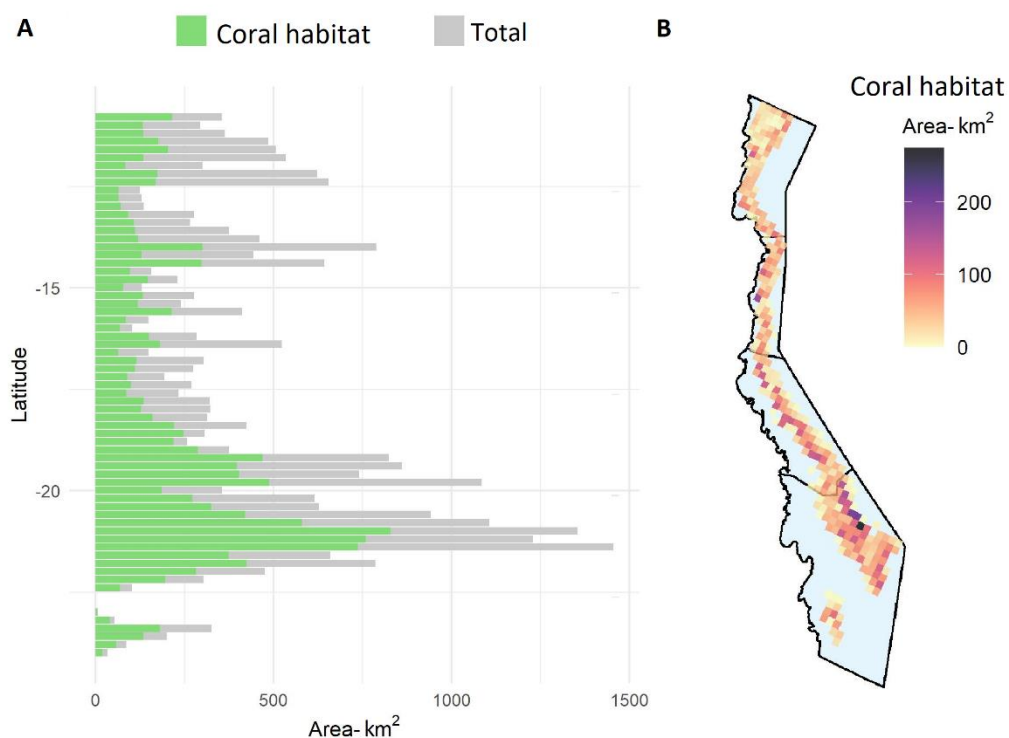

Table S1: Mapping category general description derived from Kennedy et al 2021.

| Habitat Map         | Class Name           | Class Description                                                                                                                                                                                                                                     | Coral Habitat class |
|---------------------|----------------------|-------------------------------------------------------------------------------------------------------------------------------------------------------------------------------------------------------------------------------------------------------|---------------------|
| Geomorphic Zonation | Reef Slope           | Reef Slope is a submerged, sloping area extending seaward from the Reef Crest (or Flat) towards the shelf break. Windward facing, or any direction if no dominant prevailing wind or current exists.                                                  | Yes                 |
|                     | Reef Crest           | Reef Crest is a zone marking the boundary between the reef flat and the reef slope, generally shallow and characterised by highest wave energy absorbance.                                                                                            | Yes                 |
|                     | Outer Reef Flat      | Adjacent to the seaward edge of the reef, Outer Reef Flat is a level (near horizontal), broad and shallow platform that displays strong wave-driven zonation                                                                                          | Yes                 |
|                     | Inner Reef Flat      | Inner Reef Flat is a low energy, sediment-dominated, horizontal to gently sloping platform behind the Outer Reef Flat.                                                                                                                                | No                  |
|                     | Shallow Lagoon       | Shallow Lagoon is any closed to semi-enclosed, sheltered, flat-bottomed shallow sediment-dominated lagoon area.                                                                                                                                       | No                  |
|                     | Back Reef Slope      | Back Reef Slope is a complex, interior, - often gently sloping - reef zone occurring behind the Reef Flat. Of variable depth (but deeper than Reef Flat and more sloped), it is sheltered, sediment-dominated and often punctuated by coral outcrops. | No                  |
|                     | Patch Reef           | Patch Reef is any small, detached to semi-detached lagoonal coral outcrop arising from sandy bottomed area.                                                                                                                                           | No                  |
|                     | Plateau              | Plateau is any deeper submerged, hard-bottomed, horizontal to gently sloping seaward facing reef feature.                                                                                                                                             | No                  |
|                     | Small reef           | Small Reef refers to any detached (stand-alone) reef, surrounded by Deep Water and too small (generally 1 sq km) to show a central depression and/or other clear geomorphological zonation (e.g. crest, flat, backreef) besides a Reef Slope.         | No                  |
|                     | Deep Lagoon          | Deep Lagoon is any sheltered broad body of water semi-enclosed to enclosed by reef, with a variable depth (but shallower than surrounding ocean) and a soft bottom dominated by reef-derived sediment.                                                | No                  |
|                     | Sheltered Reef Slope | Sheltered Reef Slope is any submerged, sloping area extending into Deep Water but protected from strong directional prevailing wind or current, either by land or by opposing reef structures.                                                        | Yes                 |
|                     |                      |                                                                                                                                                                                                                                                       |                     |
| Benthic Cover Type  | Coral/Algae          | Coral/Algae is any hardbottom area supporting living coral and/or algae.                                                                                                                                                                              | Yes                 |
|                     | Sand                 | Sand is any soft-bottom area dominated by fine unconsolidated sediments.                                                                                                                                                                              | No                  |
|                     | Rubble               | Rubble is any habitat featuring loose, rough fragments of broken reef material.                                                                                                                                                                       | No                  |
|                     | Rock                 | Rock is any exposed area of hard bare substrate.                                                                                                                                                                                                      | Yes                 |

Table S2: Accuracy measures including overall map accuracy and individual map-user and map-producer category accuracies are derived from a non-parametric bootstrap approach applied to traditional error matrix statistics [62]. Producer's accuracy is the probability of a reference data point being classified correctly, and user's accuracy is the probability of a classified pixel being correct

| Geomorphic Zone (0-20 m MSL) |         |              | Benthic Cover Type (0-10 m MSL) |         |              |
|------------------------------|---------|--------------|---------------------------------|---------|--------------|
| Number of Samples            | 3948    |              | Number of Samples               | 26148   |              |
| Overall Accuracy(%)          | 68      |              | Map                             | 62      |              |
| Category:                    | User(%) | Producer (%) | Category:                       | User(%) | Producer (%) |
| Shallow Lagoon               | 93      | 70           | Coral/Algae                     | 92      | 55           |
| Deep Lagoon                  | 70      | 89           | Rock                            | 47      | 72           |
| Inner Reef Flat              | 81      | 87           | Sand                            | 43      | 84           |
| Outer Reef Flat              | 52      | 80           | Rubble                          | 32      | 87           |
| Reef Crest                   | 83      | 40           |                                 |         |              |
| Sheltered Reef Slope         | 53      | 39           |                                 |         |              |
| Reef Slope                   | 68      | 34           |                                 |         |              |
| Plateau                      | 83      | 99           |                                 |         |              |
| Back Reef Slope              | 53      | 87           |                                 |         |              |
| Patch Reef                   |         |              |                                 |         |              |

31  
32  
33  
34  
35

36

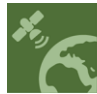

Table S3: Surface Area for Shallow Offshore GBR.

Mean estimates (and 95% Confidence Intervals) for Planar area (2D) and 3D Surface area (depth adjusted) for the geomorphic and benthic classes per mapping region (i.e. Management areas) and for the full extent of the offshore shallow reefs within the Marine Park (GBRMP). Note: Patch reef estimates are based only on size/position after the machine learning classification (i.e. there is no validation data).

|                                       |                         | Shallow Offshore Reefs mapped within the GBRMP |                                                    |                                  |                                                    |                                  |                                                    |                                  |                                                    |                                  |                                                    |
|---------------------------------------|-------------------------|------------------------------------------------|----------------------------------------------------|----------------------------------|----------------------------------------------------|----------------------------------|----------------------------------------------------|----------------------------------|----------------------------------------------------|----------------------------------|----------------------------------------------------|
|                                       |                         | GBRMP                                          |                                                    | Marine Park Management Regions   |                                                    |                                  |                                                    |                                  |                                                    |                                  |                                                    |
|                                       |                         |                                                |                                                    | Far North                        |                                                    | Cairns/Cooktown                  |                                                    | Townsville/ Whitsundays          |                                                    | Mackay/Capricorn                 |                                                    |
| Map type                              | Class                   | 2D Planar area mean (95% CI) km2               | 3D (depth adjusted) Surface area mean (95% CI) km2 | 2D Planar area mean (95% CI) km2 | 3D (depth adjusted) Surface area mean (95% CI) km2 | 2D Planar area mean (95% CI) km2 | 3D (depth adjusted) Surface area mean (95% CI) km2 | 2D Planar area mean (95% CI) km2 | 3D (depth adjusted) Surface area mean (95% CI) km2 | 2D Planar area mean (95% CI) km2 | 3D (depth adjusted) Surface Area mean (95% CI) km2 |
| Geomorphic Zonation<br>(0-20 m depth) | Shallow Lagoon          | 379 (144-483)                                  | 454 (172-579)                                      | 233 (88-297)                     | 255 (97-325)                                       | 48 (18-62)                       | 63 (24-80)                                         | 19 (7-24)                        | 25 (9-32)                                          | 79 (30-101)                      | 111 (42-142)                                       |
|                                       | Deep Lagoon             | 1684 (1469-1832)                               | 3363 (2933-3659)                                   | 735 (641-800)                    | 1213 (1058-1319)                                   | 203 (177-221)                    | 388 (338-422)                                      | 278 (243-303)                    | 591 (516-643)                                      | 468 (408-509)                    | 1172 (1022-1274)                                   |
|                                       | Inner Reef Flat         | 2255 (1918-2503)                               | 3291 (2799-3652)                                   | 924 (786-1026)                   | 1202 (1022-1333)                                   | 322 (274-358)                    | 401 (341-445)                                      | 279 (237-310)                    | 459 (390-509)                                      | 730 (621-810)                    | 1230 (1046-1365)                                   |
|                                       | Outer Reef Flat         | 1949 (1526-2281)                               | 3564 (2791-4171)                                   | 684 (535-800)                    | 1110 (869-1299)                                    | 289 (226-339)                    | 442 (346-517)                                      | 324 (254-379)                    | 697 (546-816)                                      | 652 (511-763)                    | 1315 (1029-1539)                                   |
|                                       | Reef Crest              | 543 (539-543)                                  | 1464 (1453-1464)                                   | 79 (78-79)                       | 164 (163-164)                                      | 100 (99-100)                     | 235 (233-235)                                      | 102 (101-102)                    | 293 (291-293)                                      | 262 (260-262)                    | 773 (767-773)                                      |
|                                       | Sheltered Reef Slope    | 796 (282-1264)                                 | 3787 (1340-6012)                                   | 231 (82-367)                     | 1082 (383-1717)                                    | 92 (33-147)                      | 412 (146-654)                                      | 163 (58-258)                     | 747 (264-1186)                                     | 310 (110-492)                    | 1547 (547-2455)                                    |
|                                       | Reef Slope              | 1183 (787-1512)                                | 4866 (3238-6221)                                   | 118 (79-151)                     | 401 (267-513)                                      | 221 (147-282)                    | 878 (584-1122)                                     | 442 (294-565)                    | 1765 (1175-2257)                                   | 401 (267-513)                    | 1822 (1212-2329)                                   |
|                                       | Plateau                 | 1673 (544-2703)                                | 1961 (638-3168)                                    | 878 (286-1419)                   | 954 (310-1540)                                     | 166 (54-269)                     | 225 (73-364)                                       | 428 (139-691)                    | 519 (169-838)                                      | 201 (65-325)                     | 264 (86-426)                                       |
|                                       | Back Reef Slope         | 2875 (982-4597)                                | 5476 (1871-8757)                                   | 844 (288-1349)                   | 1303 (445-2084)                                    | 593 (203-949)                    | 1192 (407-1907)                                    | 789 (270-1262)                   | 1530 (523-2447)                                    | 648 (222-1037)                   | 1450 (495-2319)                                    |
|                                       | Coral Habitat*          | 4471 (3134-5600)                               | 13682 (8821-17868)                                 | 1112 (774-1397)                  | 2757 (1681-3693)                                   | 703 (505-868)                    | 1966 (1309-2528)                                   | 1031 (707-1305)                  | 3502 (2275-4551)                                   | 1626 (1148-2031)                 | 5456 (3556-7096)                                   |
|                                       | Total Area              | 13351 (8203-17731)                             | 28261 (17267-37716)                                | 4728 (2865-6289)                 | 7689 (4618-10301)                                  | 2038 (1234-2728)                 | 4241 (2498-5751)                                   | 2828 (1606-3898)                 | 6636 (3892-9030)                                   | 3756 (2497-4816)                 | 9694 (6258-12634)                                  |
|                                       | Number of reefs         |                                                | 2164                                               |                                  | 586                                                |                                  | 240                                                |                                  | 419                                                |                                  | 919                                                |
| Benthic Category<br>(0-10 m depth)    | Sand                    | 3918 (2119-5613)                               | 6348 (3434-9096)                                   | 1527 (826-2188)                  | 2001 (1082-2866)                                   | 599 (324-858)                    | 919 (497-1317)                                     | 601 (325-861)                    | 1141 (617-1635)                                    | 1190 (644-1705)                  | 2287 (1237-3277)                                   |
|                                       | Rubble                  | 595 (416-749)                                  | 1428 (997-1798)                                    | 174 (122-219)                    | 336 (235-424)                                      | 116 (81-146)                     | 266 (186-335)                                      | 135 (94-170)                     | 336 (235-423)                                      | 170 (119-214)                    | 489 (341-615)                                      |
|                                       | Rock                    | 2015 (1609-2274)                               | 5567 (4445-6282)                                   | 574 (458-647)                    | 1174 (937-1325)                                    | 379 (303-428)                    | 968 (773-1092)                                     | 433 (346-489)                    | 1380 (1102-1557)                                   | 629 (502-710)                    | 2045 (1633-2308)                                   |
|                                       | Coral/Algae             | 2310 (1946-2539)                               | 5046 (4251-5547)                                   | 883 (744-971)                    | 1731 (1459-1903)                                   | 336 (283-369)                    | 669 (564-736)                                      | 382 (322-420)                    | 902 (760-991)                                      | 708 (597-779)                    | 1744 (1469-1917)                                   |
|                                       | Coral Habitat**         | 4325 (3555-4813)                               | 10613 (8696-11828)                                 | 1457 (1202-1618)                 | 2906 (2396-3228)                                   | 715 (586-797)                    | 1637 (1337-1828)                                   | 816 (668-909)                    | 2282 (1861-2548)                                   | 1337 (1099-1488)                 | 3788 (3102-4224)                                   |
|                                       | Total Area              | 8837 (6089-11175)                              | 18388 (13127-22722)                                | 3159 (2150-4026)                 | 5242 (3713-6518)                                   | 1430 (990-1801)                  | 2822 (2020-3480)                                   | 1551 (1087-1940)                 | 3759 (2714-4607)                                   | 2698 (1862-3408)                 | 6564 (4680-8117)                                   |
|                                       | Number of reefs         |                                                | 1946                                               |                                  | 539                                                |                                  | 226                                                |                                  | 369                                                |                                  | 812                                                |
| Current baseline                      | Total Area              |                                                | 21654                                              |                                  | 8486                                               |                                  | 3033                                               |                                  | 4872                                               |                                  | 5262                                               |
| (Lewis et al 2003)                    | Number of reef polygons |                                                | 2600                                               |                                  | 645                                                |                                  | 251                                                |                                  | 489                                                |                                  | 1215                                               |

\*Reef Slope+sheltered Slope+Reef Crest+Outer Reef Flat \*\*Rock + Coral/Algae
